# Supplementary material
Source: MDPI journal article supplement (https://www.mdpi.com/2813-0545/3/2/8)
Supplement: s1 [file s1]

## Supplementary Materials:

# Morphological and Immunohistochemical Characterization of Bone Structure and Cell–Cell Communication in a Rat Osteoporosis Model

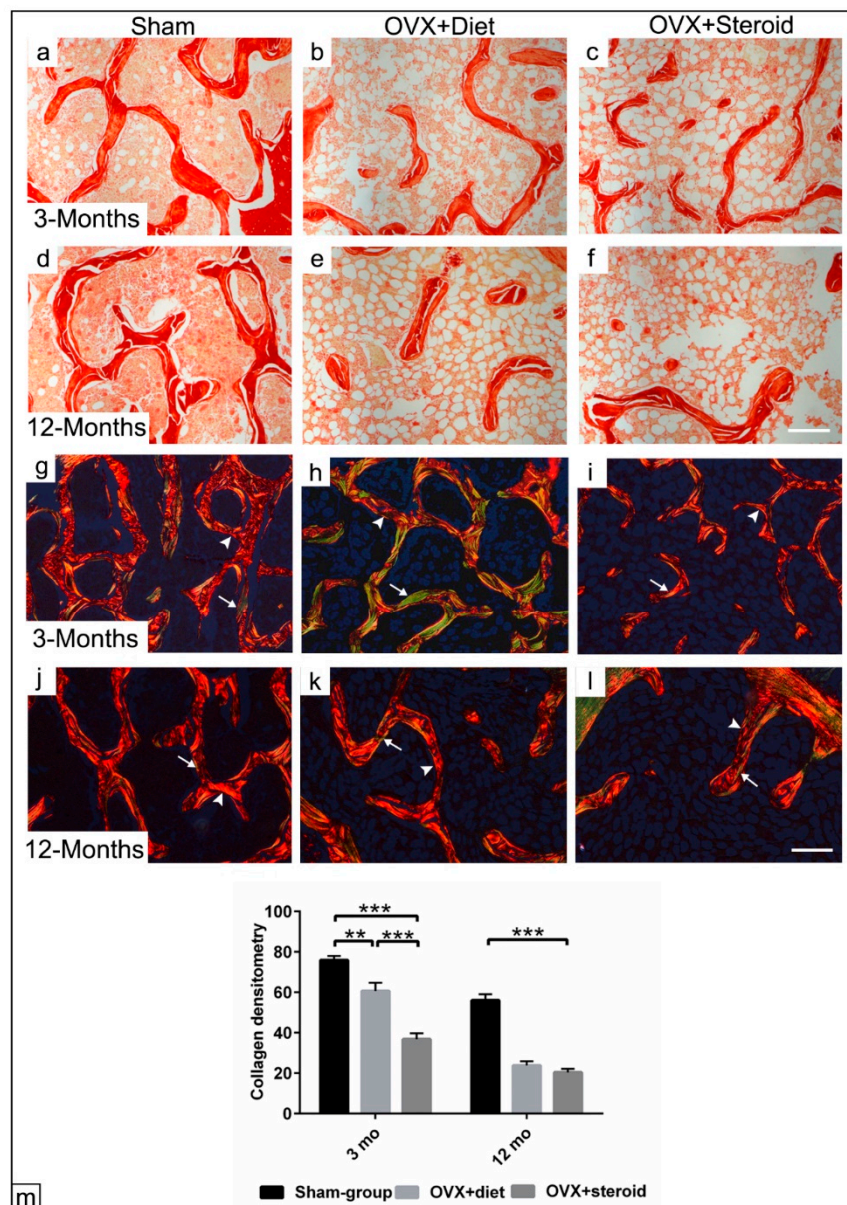

**Supplementary Figure S1.** (a–l) Micrographs show collagen staining of rat lumbar 4 (L4) trabeculae of sham, OVX+diet, and OVX+steroid after 3 and 12 months post osteoporosis induction ( $n = 6$  per time point). Non-calcified L4 bodies were processed for paraffin embedding and 10  $\mu\text{m}$  sections were stained with Picosirrus red staining for one hour. (a–f) Light microscope micrographs show collagen stained (red) trabeculae. (g–l) Polarized microscope micrographs demonstrate the distribution of collagen type I (red, arrow head) and collagen type III (green, arrow). (m) Quantification of collagen densities show marked reduction of the collagen density in OVX+diet, and OVX+steroid compared to sham-group at 3 and 12 months. All data are presented as the mean  $\pm$  SD. Scale bar = 100  $\mu\text{m}$ . \*\* =  $p < 0.01$  and \*\*\* =  $p < 0.001$ .
