# Supplementary material
Source: MDPI journal article supplement (https://www.mdpi.com/2813-0545/3/2/8)
Supplement: s1 [file s1]

Archive with 1 entries (1 files):
- anatomia-2862605-supplementary.pdf
